# Supplementary material
Source: PubMed Central journal article supplement (PMC3654377)
Supplement: NIHMS462318-supplement-01.pdf [file NIHMS462318-supplement-01.pdf]

**List of the supplementary materials**

Fig. S1. Sleep-wake pattern and diurnal fluctuation of interstitial fluid (ISF) A $\beta$  in the hippocampus and striatum of 3 and 9 month-old wild-type littermate mice.

Fig. S2. A $\beta$  plaque deposition in female APP<sup>swe</sup>/PS1 $\delta$ E9 (APP/PS1) mice at 3, 6, and 9 months of age and in wild-type littermates at 9 months of age.

Fig. S3. Correlation between wakefulness and levels of interstitial fluid (ISF) lactate.

Fig. S4. Correlation between levels of interstitial fluid (ISF) lactate and ISF A $\beta$  in APP<sup>swe</sup>/PS1 $\delta$ E9 mice.

Fig. S5. Correlation between levels of interstitial fluid (ISF) lactate and ISF A $\beta$  in A $\beta$ <sub>42</sub>- and phosphate buffered saline (PBS)-immunized APP<sup>swe</sup>/PS1 $\delta$ E9 mice.

Fig. S6. Changes in diurnal fluctuation of interstitial fluid (ISF) A $\beta$ <sub>x-42</sub> in the hippocampus and in the striatum of 3 and 9 month old APP<sup>swe</sup>/PS1 $\delta$ E9 mice.

Fig. S7. Changes in diurnal fluctuation of interstitial fluid (ISF) A $\beta$ <sub>x-42</sub> in the hippocampus and in the striatum of 9 month old phosphate buffered saline (PBS)-treated and A $\beta$ <sub>42</sub>-vaccinated APP<sup>swe</sup>/PS1 $\delta$ E9 mice.

## Supplementary Materials

### Supplementary Figure 1

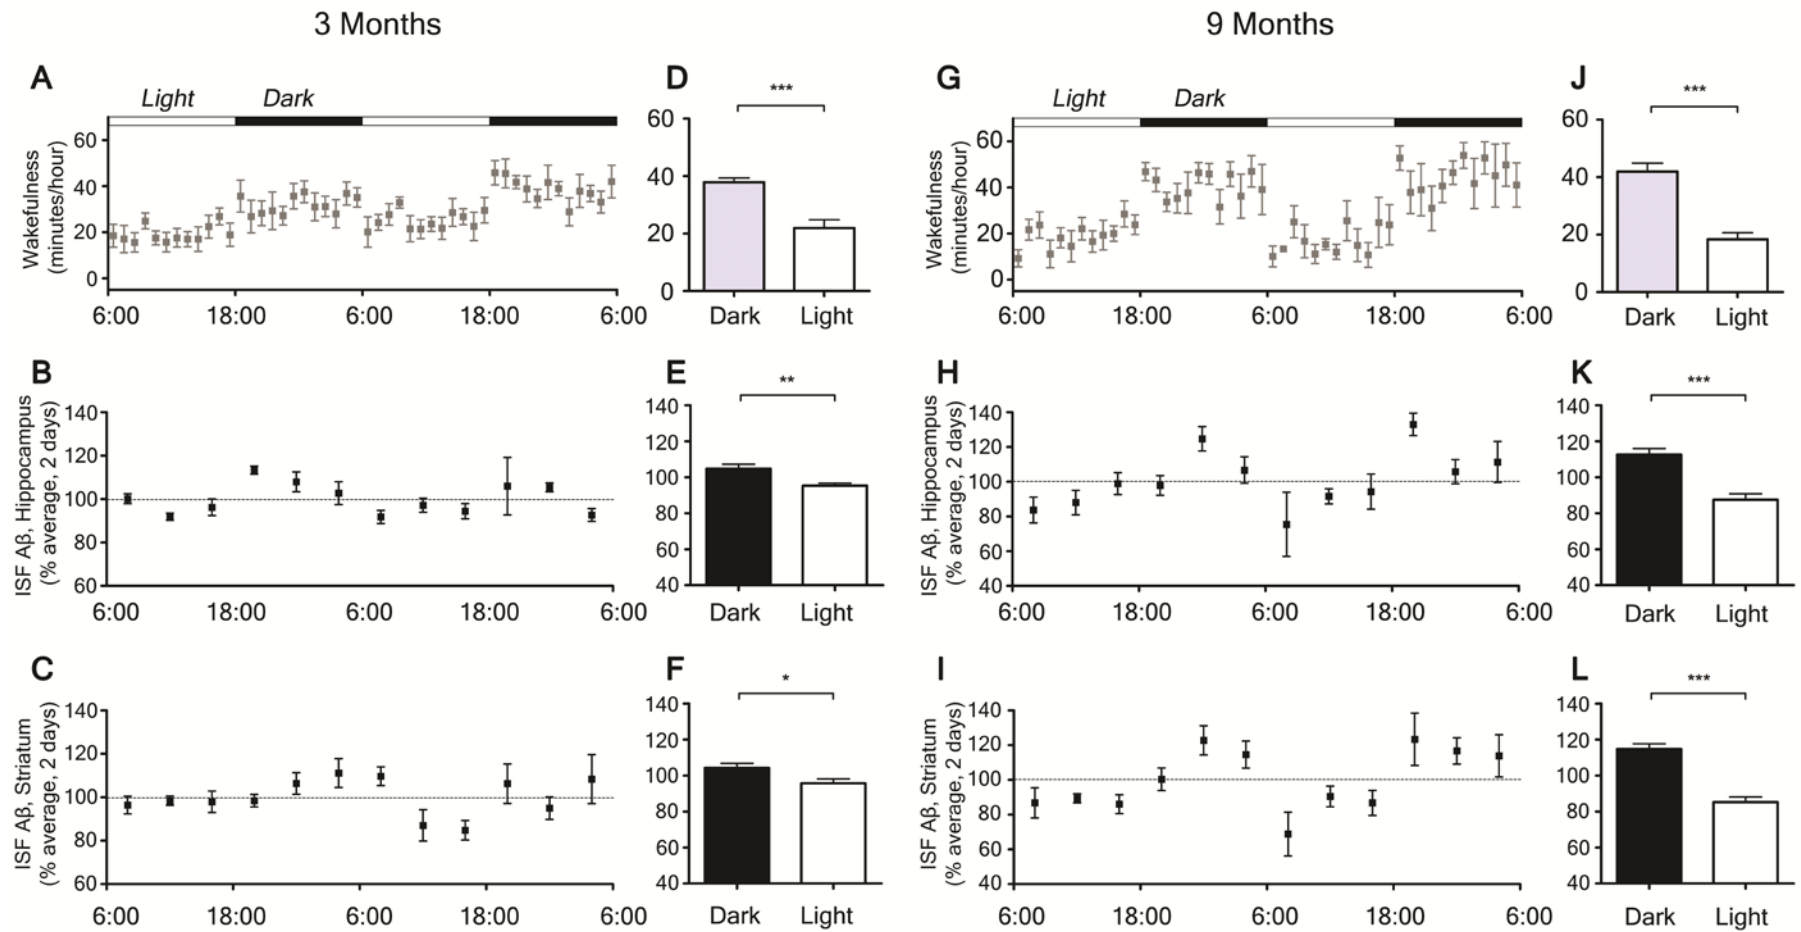

Sleep-wake pattern and diurnal fluctuation of interstitial fluid (ISF) A $\beta$  in the hippocampus and striatum of 3 and 9 month-old wild-type littermate mice. **(A, G)** Sleep-wake patterns in 3 **(A)** and 9 **(G)** month-old wild-type mice across 2 days (2 light-dark periods) presented by minutes awake per hour. **(D, J)** Comparison of minutes awake per hour between the dark and light periods in each group (n = 5 per group; two tailed t-test). **(B, H)** Diurnal fluctuation of ISF A $\beta_{x-40}$  in the hippocampus of 3 **(B)** and 9 **(H)** month-old wild-type littermates across 2 days presented as % average of absolute values of ISF A $\beta_{x-40}$ . **(E, K)** Comparison of % average of absolute values of ISF A $\beta_{x-40}$  in the hippocampus between the dark and light periods (n = 5 per group; two tailed t-test). **(C, I)** Diurnal fluctuation of ISF A $\beta_{x-40}$  in the striatum of 3 **(C)** and 9 **(I)** month-old wild-type mice across 2 days. **(F, L)** Comparison of % average of absolute values of ISF A $\beta_{x-40}$  in the striatum between the dark and light periods (n = 5 per group; two tailed t-test). \* $P < 0.05$ ; \*\* $P < 0.01$ ; \*\*\* $P < 0.001$ . Values represent mean  $\pm$  s.e.m.

## Supplementary Figure 2

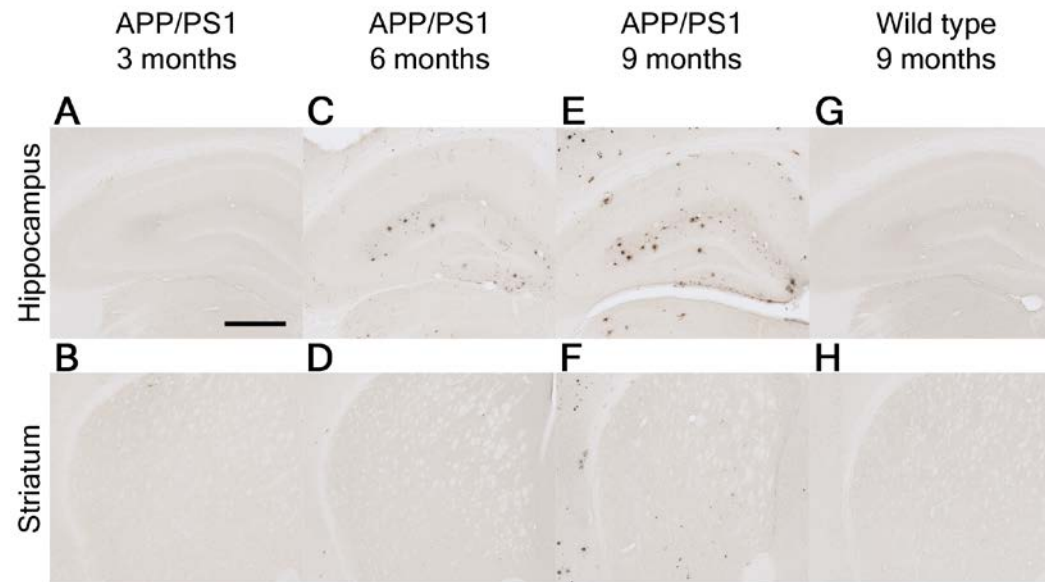

A $\beta$  plaque deposition in female APP<sup>swe</sup>/PS1 <sup>$\Delta$ E9</sup> (APP/PS1) mice at 3, 6, and 9 months of age and in female wild-type littermates at 9 months of age. (**A-H**) Representative brain sections of the hippocampus (**A, C, E, G**) and striatum (**B, D, F, H**) stained with anti-A $\beta$  N-terminal antibody HJ 3.4 to visualize A $\beta$  immunoreactive plaques. Scale bar in (**A**) is 500  $\mu$ m.

### Supplementary Figure 3

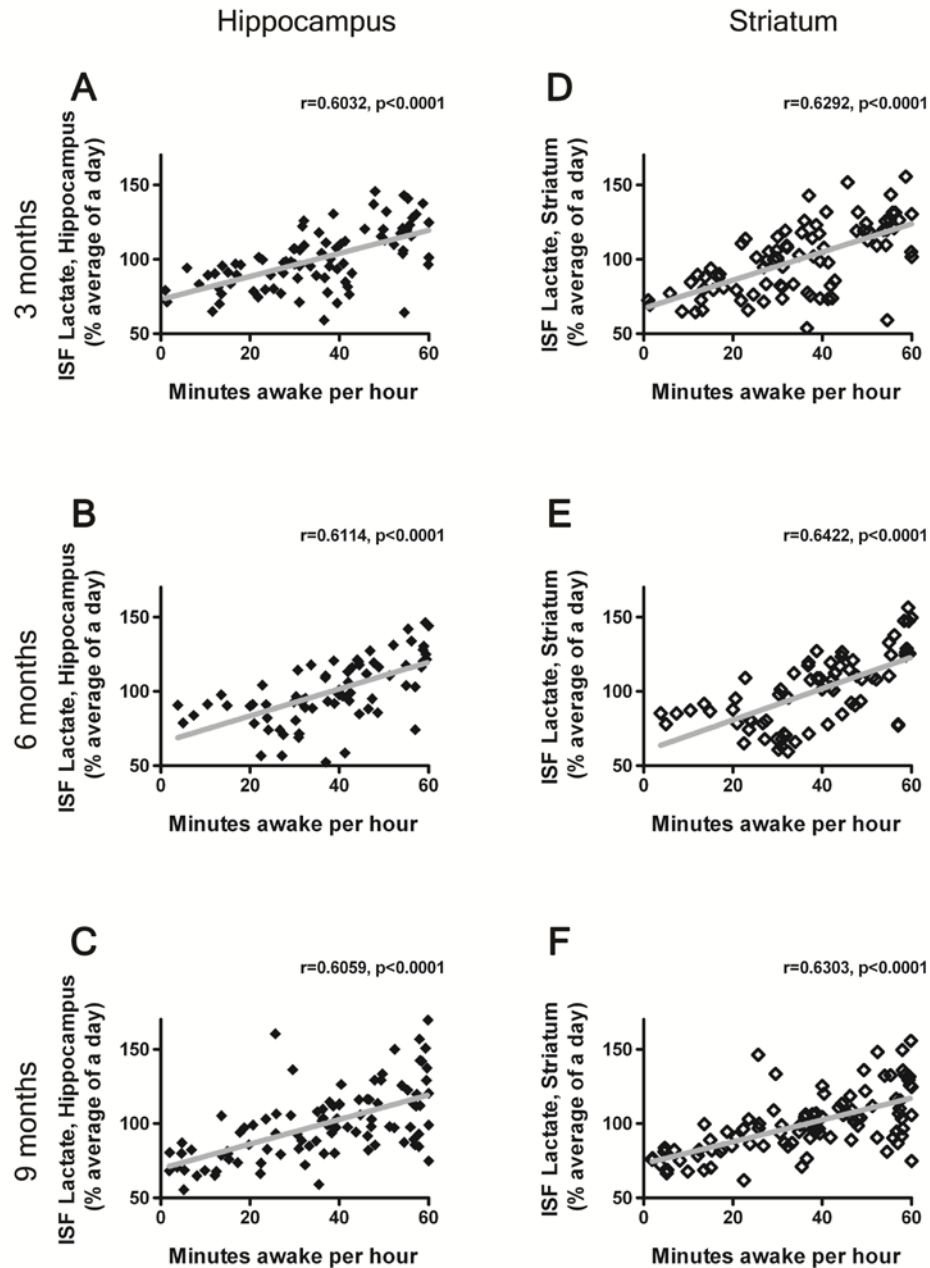

Correlation between wakefulness and [concentrations levels](#) of interstitial fluid (ISF) lactate. (A-F) Correlation presented as minutes awake per hour and % average of 24 hours of absolute values of ISF lactate in the hippocampus (A-C) and striatum (D-F) of APPswe/PS1 $\delta$ E9 mice at 3, 6, and 9 months (n = 72-96 paired measurement per group; Pearson's correlation test).

## Supplementary Figure 4

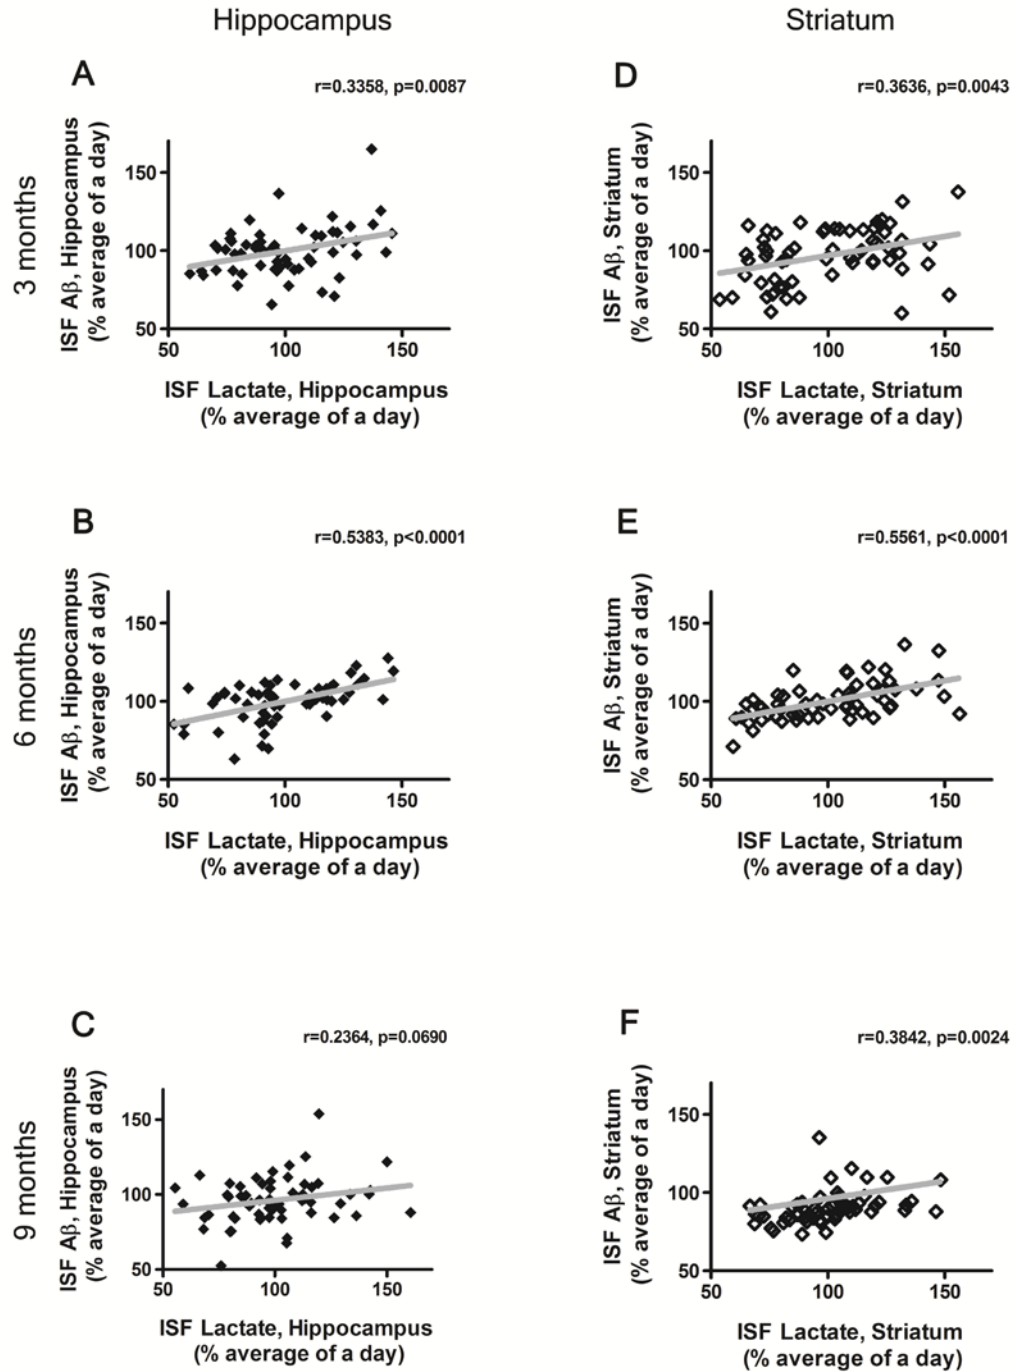

Correlation between [concentrations/levels](#) of interstitial fluid (ISF) lactate and ISF Aβ in APPswe/PS1δE9 mice. (A-F) Correlation presented as % average of 24 hours of absolute values

of ISF lactate and % average of 24 hours of absolute values of ISF  $A\beta_{1-x}$  in the hippocampus (**A-C**) and striatum (**D-F**) of APP<sup>swe</sup>/PS1 $\delta$ E9 mice at 3, 6, and 9 months of age (n = 60 paired measurement per group; Pearson's correlation test).

## Supplementary Figure 5

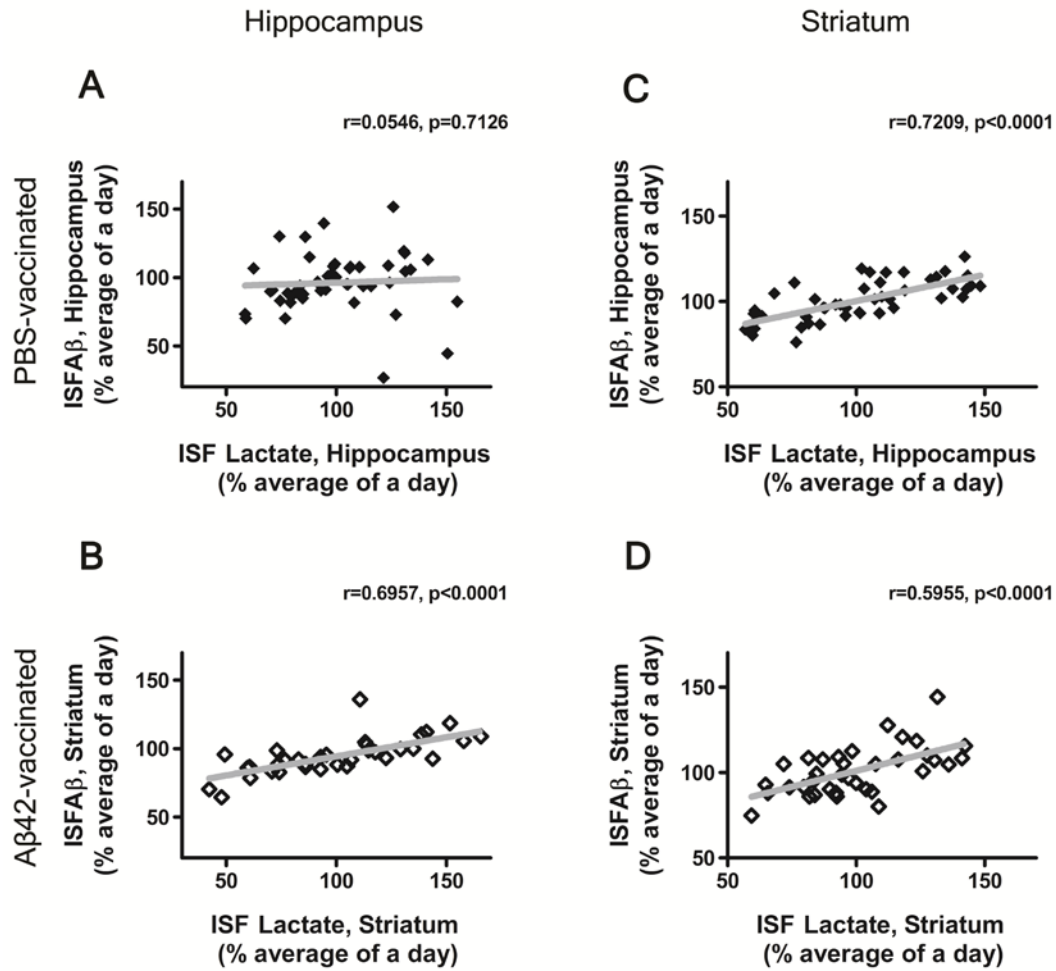

Correlation between [concentrations levels](#) of interstitial fluid (ISF) lactate and ISF Aβ in Aβ<sub>42</sub>- and phosphate buffered saline (PBS)-immunized APPswe/PS1δE9 mice. (A-D) Correlation presented as % average of 24 hours of absolute values of ISF lactate and % average of 24 hours of absolute values of ISF Aβ<sub>1-x</sub> in the hippocampus and striatum of PBS-treated APPswe/PS1δE9 mice (A, C) and Aβ<sub>42</sub>-vaccinated APPswe/PS1δE9 mice (B, D) in 9 months of age (n = 36-48 paired measurement per group; Pearson's correlation test).

## Supplementary Figure 6

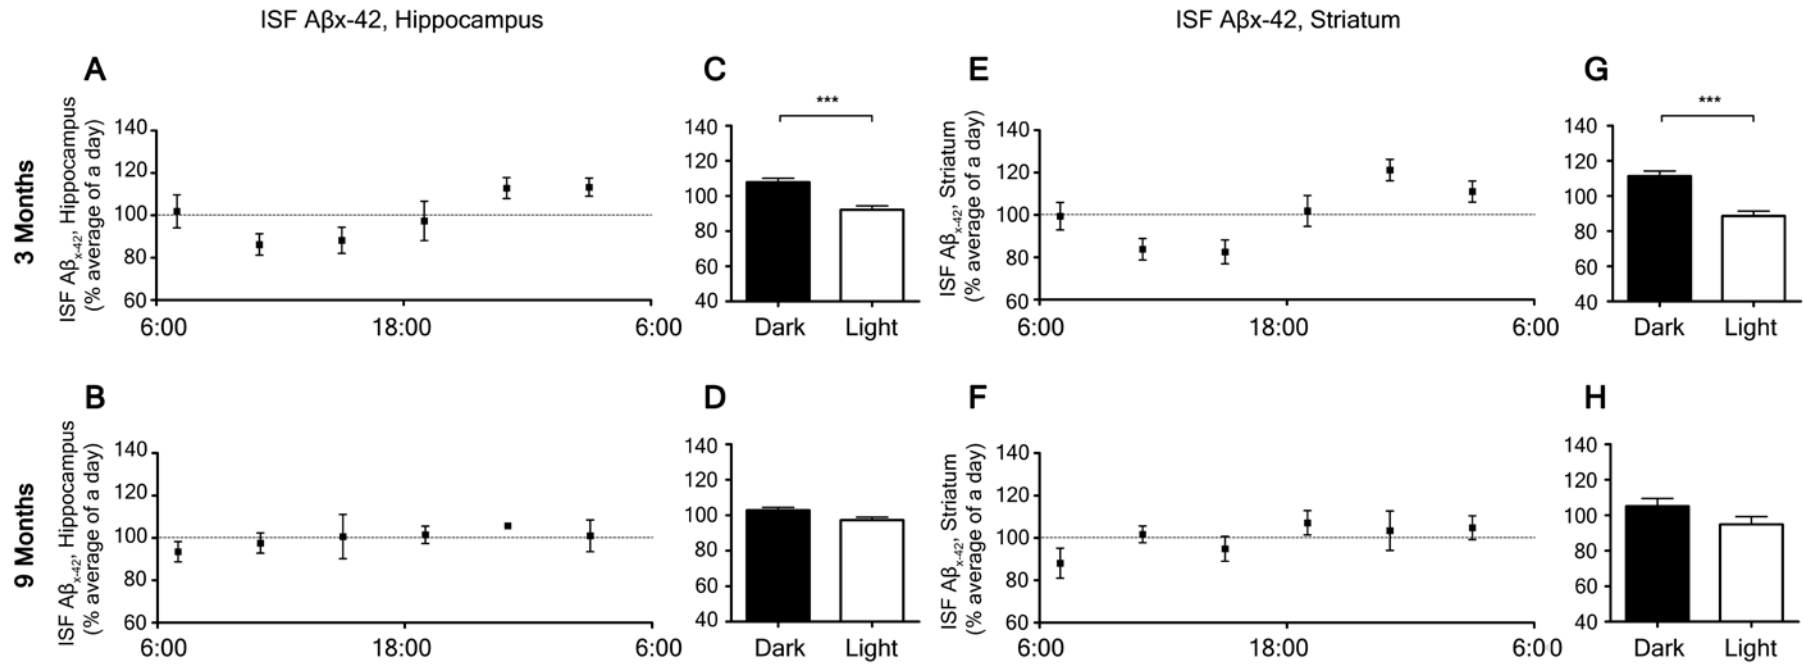

Changes in diurnal fluctuation of interstitial fluid (ISF) Aβ<sub>x-42</sub> in the hippocampus and in the striatum of 3 and 9 month old

APPswe/PS1δE9 mice. (A, B, E, F) Diurnal fluctuation of ISF Aβ<sub>x-42</sub> in the hippocampus (A, B) and in the striatum (E, F) of 3 and 9 month old APPswe/PS1δE9 mice across 24 hours (one light-dark period) presented as % average of absolute values of ISF Aβ<sub>x-42</sub>.

(C, D, G, H) Comparison of % average of 24 hours of absolute values of ISF Aβ<sub>x-42</sub> in the hippocampus (C, D) and in the striatum (G, H) between the dark and light periods (n = 5 per group; two tailed t-test). \*\*\*P < 0.001. Values represent mean ± s.e.m.

## Supplementary Figure 7

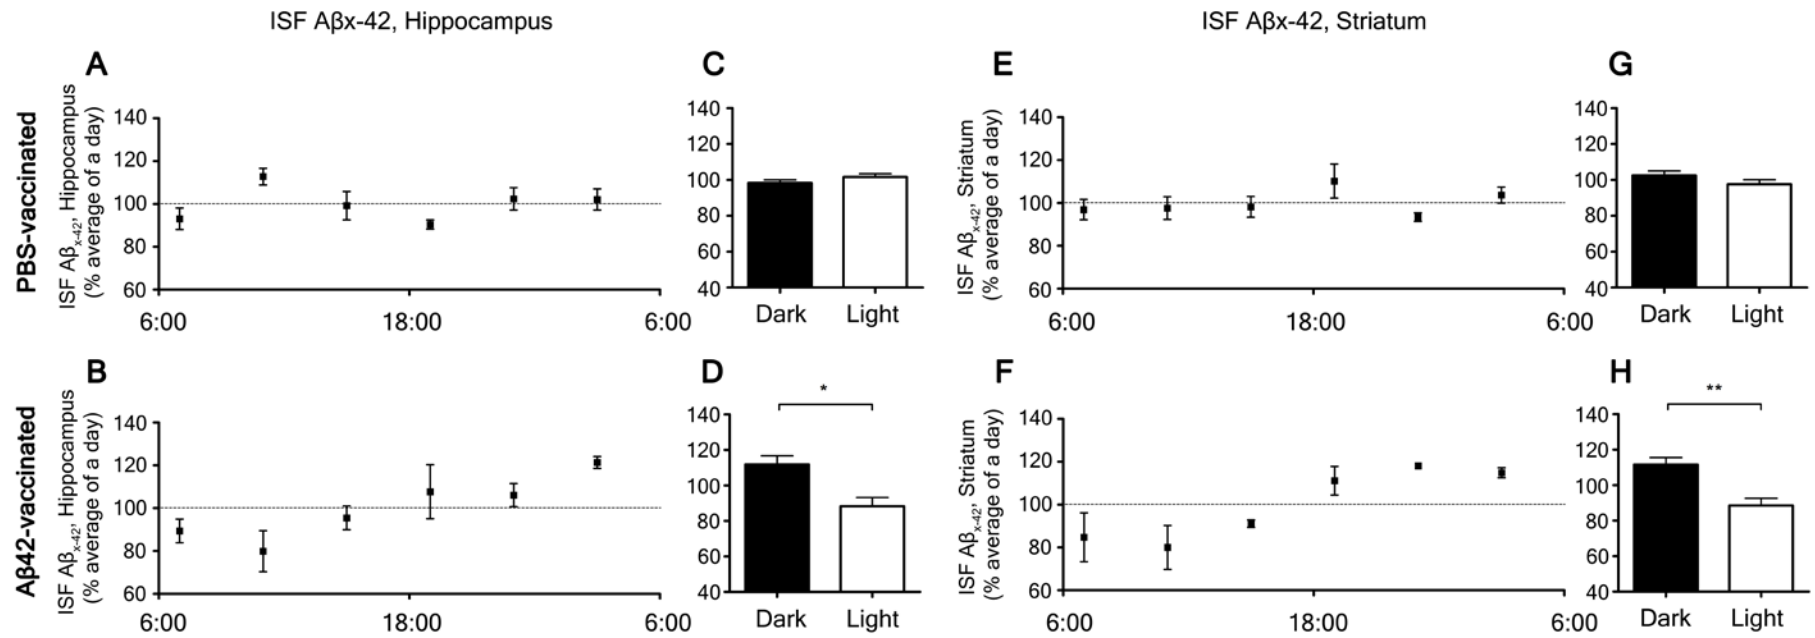

Changes in diurnal fluctuation of interstitial fluid (ISF) Aβ<sub>x-42</sub> in the hippocampus and in the striatum of 9 month old phosphate buffered saline (PBS)-treated and Aβ<sub>42</sub>-vaccinated APPsw/PS1δE9 mice. (**A**, **B**, **E**, **F**) Diurnal fluctuation of ISF Aβ<sub>x-42</sub> in the hippocampus of PBS-treated (**A**) and Aβ<sub>42</sub>-vaccinated (**B**) APPsw/PS1δE9 mice and diurnal fluctuation of ISF Aβ<sub>x-42</sub> in the striatum of PBS-vaccinated (**E**) and Aβ<sub>42</sub>-vaccinated (**F**) APPsw/PS1δE9 mice. Data represents % average of 24 hours of absolute values of ISF Aβ<sub>x-42</sub> across 24 hours (1 light-dark period). (**C**, **D**, **G**, **H**) Comparison of % average of absolute values of ISF Aβ<sub>x-42</sub> in the

hippocampus (**C, D**) and in the striatum (**G, H**) between the dark and light periods (n = 5-6 per group; two tailed t-test). \* $P < 0.05$ ;

\*\* $P < 0.01$ . Values represent mean  $\pm$  s.e.m.

### Supplementary Figure 8

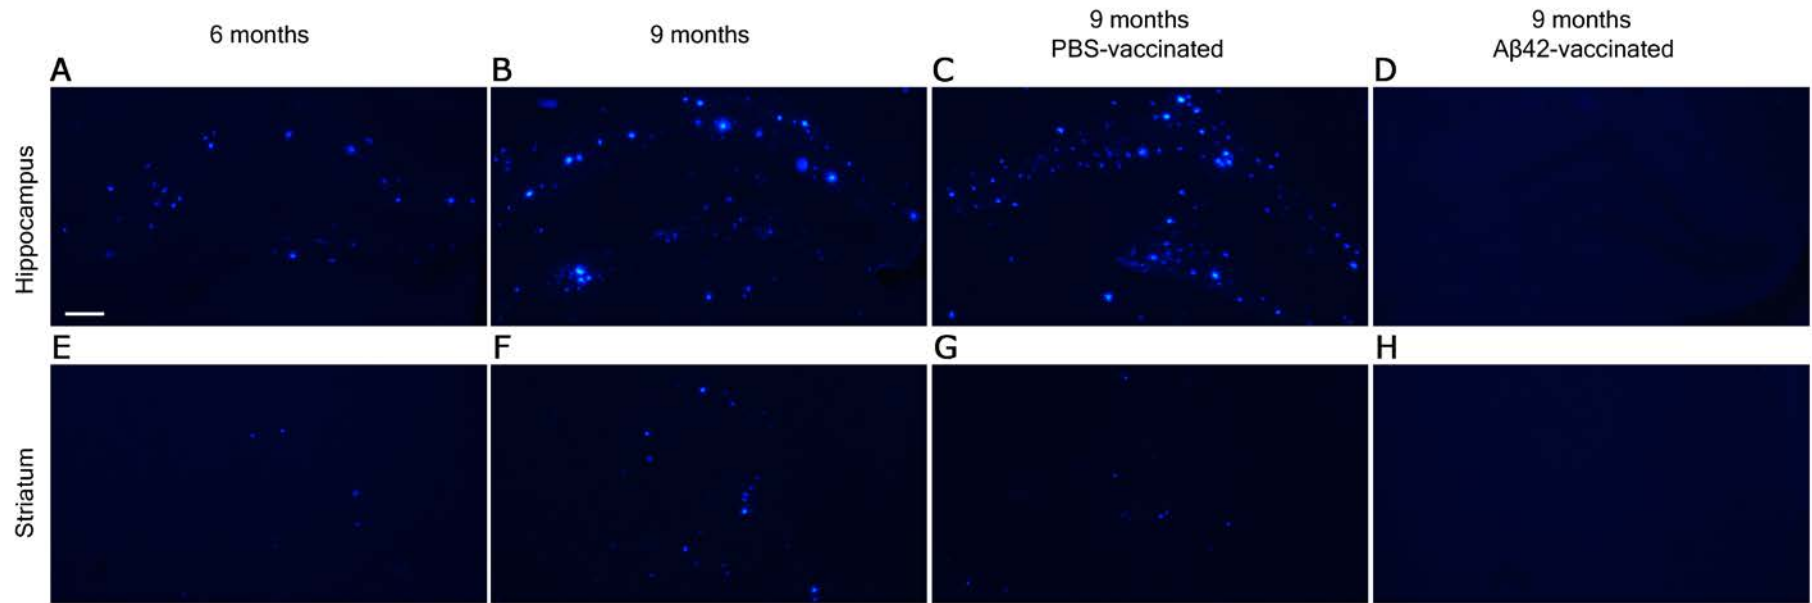

X-34 positive amyloid plaque deposition in the hippocampus and striatum of 6 and 9 months old APPswe/PS1δE9 mice and 9 months old phosphate buffered saline (PBS)-vaccinated and Aβ<sub>42</sub>-vaccinated APPswe/PS1δE9 mice. (**A-H**) Representative images of hippocampus (**A-D**) and striatum (**E-H**) stained by amyloid-binding dye X-34 to visualize fibrillar amyloid plaques in 6 and 9 month old APPswe/PS1δE9 mice (**A, E, B, F**), PBS-treated mice (**C, G**) and Aβ<sub>42</sub>-vaccinated mice (**D, H**) at 9 months. Scale bar in (**A**) is 50μm.
